# Supplementary material
Source: HighWire-hosted journal article supplement (https://cmaj.ca/highwire/filestream/57752/field_highwire_adjunct_files/0/57-58.pdf)
Supplement: 57-58.pdf [file 57-58.pdf]

## CAS

## Dépistage urinaire des opiacés : faux positif associé à la prise de lévofloxacin

Qaiser Shafiq MD, Anand Mutgi MD

Publié précédemment dans [www.cmaj.ca](http://www.cmaj.ca)

Une femme de 96 ans souffrant de démence modérée à sévère est admise dans un état de délire aigu. Selon un proche de la patiente, celle-ci avait rapporté durant les derniers jours un état de faiblesse généralisée et constaté une diminution de son appétit. La veille de son admission, elle s'est mise à avoir des hallucinations visuelles et auditives.

Au moment de l'admission, la patiente délire et souffre de détresse respiratoire modérée : respiration rapide et superficielle et taux de saturation de l'oxygène de 88 % à l'air ambiant. L'auscultation révèle des râles crépitants bilatéraux à l'inspiration et des bronchus du côté droit. Sa tension artérielle est de 140/75 mm Hg, et son pouls est de 110 battements/minute avec un rythme sinusal normal; sa température corporelle est de 37,2 °C. Les résultats initiaux des examens d'imagerie et d'analyse en laboratoire sont normaux, y compris l'examen tomographique de la tête, les radiographies du thorax, la numération complète avec formule leucocytaire, le test de la fonction thyroïdienne et ceux se rapportant au taux d'électrolytes, aux enzymes hépatocytaires, à l'amylase, à la lipase, aux enzymes cardiaques, à la vitamine B<sub>12</sub>, à la folate érythrocyte, au fer, à l'ammoniaque et à l'alcool dans le sang. Les résultats des tests de gaz sanguins sont normaux, à l'exception de la pression partielle d'oxygène de 60. Les résultats de la coloration de Gram, de l'hémoculture, de l'uroculture et de l'analyse salivaire ne révèlent aucune bactérie. Le contrôle pour analyse toxicologique de l'urine donne des résultats négatifs aux opiacés et aux benzodiazépines. Une électrocardiographie à douze dérivations ne révèle pas de syndrome coronarien aigu ni d'arythmies. Pour traiter une possible pneumonie par aspiration, on commence un traitement empirique à base d'antibiotiques à large spectre, dont la pipéracilline-tazobactam et la vancomycine.

Trois jours plus tard, l'état de la patiente s'aggrave sur les plans mental et respiratoire. On ajoute la lévofloxacin au traitement pour assurer une couverture contre les bactéries atypiques. On effectue un examen neurologique pour écarter les causes neurologiques de l'aggravation de l'état mental de la patiente. On recourt aussi à l'imagerie par résonance magnétique et à l'électroencéphalographie pour examiner le cerveau de la patiente, sans déceler de pathologie neurologique aiguë. On diagnostique une encéphalopathie métabolique consécutive à la pneumonie sous-jacente.

Selon les services sociaux, la patiente vit chez elle avec un

### Éléments clés

- Les médicaments d'usage courant peuvent interagir avec le test immunoenzymatique de dépistage urinaire d'opiacés et d'autres substances et donner lieu à des résultats faussement positifs.
- Au moment d'interpréter en clinique les résultats d'un test d'analyse toxicologique de l'urine, il convient de vérifier l'ensemble des médicaments pris par le patient.
- Si l'on présume que les résultats du dépistage d'opiacés sont faussement positifs, il convient d'effectuer un test de confirmation selon une méthode quantitative, non immunologique, comme une spectroscopie.

proche depuis plusieurs années. Elle bénéficie de soins infirmiers et d'autres services à domicile. Or, le tribunal a nommé un avocat comme tuteur légal de la patiente par suite de soupçons de violence corporelle à son l'endroit exprimés par le personnel de la maison de soins infirmiers. En raison du changement de l'état mental de la patiente et des probables sévices physiques, nous envisageons la possibilité d'une erreur et reprenons le test d'analyse toxicologique de l'urine. À notre grand étonnement, les résultats révèlent la présence d'opiacés. Nous entreprenons alors un examen complet pour déterminer les sources possibles d'opiacés. Or, aucun résultat probant ne démontre qu'on aurait administré des médicaments contenant des opiacés à la patiente depuis son admission; le personnel infirmier écarte toute erreur de médication.

En dépouillant la littérature à la recherche de données sur les résultats faussement positifs des tests de dépistage urinaire d'opiacés, nous avons découvert un article de Baden et de ses collègues<sup>1</sup> portant sur l'interaction entre de tels faux positifs et les fluoroquinolones, dont la lévofloxacin, en contexte de test immunoenzymatique. Notre laboratoire a exécuté le test immunoenzymatique SYNCHRON pour l'analyse toxicologique de l'urine, selon un seuil de concentration d'opiacés de 300 ng/ml (1050 nmol/L).

Pour confirmer le caractère faussement positif des résultats du dépistage urinaire, le même échantillon d'urine (faux positif) et un échantillon de sang, prélevé dans l'heure suivant le

Service d'endocrinologie, de diabète et d'hypertension (Shafiq), Brigham and Women's Hospital, Harvard Medical School, Boston, É.-U.; Département de médecine interne (Mutgi), University of Toledo Medical Center, Toledo, É.-U.

prélèvement d'urine, sont envoyés dans un laboratoire externe pour un test de confirmation non immunologique (spectroscopie de masse). Or, les deux échantillons donnent des résultats négatifs aux opiacés selon des seuils de concentration d'opiacés de 5 ng/ml (17,5 nmol/L) pour l'urine et de 2 ng/ml (7 nmol/L) pour le sang.

Nous cessons l'administration de lévofloxacine pour la remplacer par l'azithromycine. Une semaine plus tard, le test immunoenzymatique SYNCHRON d'analyse toxicologique de l'urine pour le dépistage d'opiacés donne des résultats négatifs. Les symptômes de la patiente se résorbent graduellement et cette dernière est transférée dans un établissement de soins de longue durée.

## Examen de la question

On fait couramment appel aux méthodes qualitatives immunoenzymatiques pour le dépistage urinaire en raison de leur grande disponibilité, de leur faible coût et de leur rapidité à fournir des résultats comparativement aux méthodes non immunologiques. Les fluoroquinolones, comme la lévofloxacine, sont fréquemment prescrits pour le traitement d'infections d'origine hospitalière ou extrahospitalière. Tout dépistage urinaire d'opiacés au moyen de méthodes immunoenzymatiques donnant des résultats faussement positifs pour un patient traité à la lévofloxacine peut

**Tableau 1** : Réactivité croisée des médicaments d'usage courant dans le cadre de tests de dépistage toxicologique urinaire

| Drogue dépistée par des résultats faussement positifs | Médicament instigateur du résultat                                       |
|-------------------------------------------------------|--------------------------------------------------------------------------|
| Amphétamine et méthamphétamine                        | Sélégiline, inhalation de vapeur de camphre ou de menthol                |
| Barbiturique                                          | Anti-inflammatoire non stéroïdien (ibuprofène, naproxen)                 |
| Benzodiazépine                                        | Oxaprozine                                                               |
| Cannabinoïde                                          | Anti-inflammatoire non stéroïdien (ibuprofène, naproxen)                 |
| Opiacé                                                | Fluoroquinolones (lévofloxacine, ofloxacine et pefloxacine), rifampicine |
| Phencyclidine                                         | Venlafaxine, dextrométhorphan                                            |

Sources : Vincent et coll.<sup>5</sup>

conduire à des décisions erronées et à des dommages causés par inadvertance<sup>1-4</sup>. Baden et ses collègues constatent qu'une seule dose de lévofloxacine peut interférer avec le test immunoenzymatique de dépistage d'opiacés et que le caractère faussement positif de l'échantillon peut perdurer 24 heures ou plus, selon la clairance de la lévofloxacine du système. Dans le cadre de leur étude fondée sur 6 volontaires en santé, les chercheurs ont étudié la réactivité croisée de 13 quinolones différents au moyen de 5 tests commerciaux de dépistage d'opiacés. Neuf quinolones ont obtenu des résultats faussement positifs à au moins un des tests. La lévofloxacine, l'ofloxacine et la péfloxacine ont démontré la plus grande constance à produire des résultats faussement positifs<sup>1</sup>.

Les fluoroquinolones ne sont pas les seuls médicaments à présenter un risque de réactivité croisée durant les tests immunoenzymatiques de dépistage urinaire. En effet, d'autres médicaments présentant le même risque sont vendus sans ordonnance, comme l'ibuprofène et la dextrométhorphan (tableau 1)<sup>5</sup>, ainsi que la venlafaxine, la sélégiline, l'oxaprozine et la rifampicine. Selon l'interaction, les tests peuvent donner des résultats faussement positifs dans le dépistage des benzodiazépines, des opiacés, des amphétamines, des barbituriques, des cannabinoïdes et de la phencyclidine (PCP).

En présence d'un risque de fausse positivité des résultats de dépistage urinaire, il est nécessaire d'effectuer un test de confirmation basé sur des méthodes quantitatives et non immunologiques, comme la chromatographie gazeuse, la spectroscopie de masse ou la chromatographie liquide haute performance.

Cet article a fait l'objet d'une évaluation par des pairs.

**Intérêts conflictuels** : Aucun déclaré.

## RÉFÉRENCES

1. Baden LR, Horowitz G, Jacoby H, et coll. « Quinolones and false-positive urine screening for opiates by immunoassay technology ». *JAMA* 2001;286:3115-9.
2. Straley CM, Cecil EJ, Herriman MP. « Gatifloxacin interference with opiate urine drug screen ». *Pharmacotherapy* 2006;26:435-9.
3. Zacher JL, Givone DM. « False-positive urine opiate screening associated with fluoroquinolone use ». *Ann Pharmacother* 2004;38:1525-8.
4. Meatherall R, Dai J. « False-positive EMIT II opiates from ofloxacin ». *Ther Drug Monit* 1997;19:98-9.
5. Vincent EC, Zebelman A, Goodwin C, et coll. « Clinical inquiries. What common substances can cause false positives on urine screens for drugs of abuse? » *J Fam Pract* 2006;55:893-4, 897.

**Correspondance adressée à** : D' Qaiser Shafiq, Department of Internal Medicine, University of Toledo Medical Center, 3045 Arlington Ave., Toledo OH 43614, USA; qaiser.shafiq@utoledo.edu
